# Supplementary material
Source: PubMed Central journal article supplement (PMC4699573)
Supplement: NIHMS738959-supplement-ESI.pdf [file NIHMS738959-supplement-ESI.pdf]

Supporting Information

***De novo* Design of Protein Mimics of B-DNA**

Deniz Yüksel, Piero R. Bianco, and Krishna Kumar\*

## Experimental Methods

**Peptide synthesis, purification, and characterization:** All peptides were synthesized on Advanced ChemTech 348  $\Omega$  synthesizer (Louisville, KY) using Rink amide NovaGel™ resin (resin substitution: 0.63 mmole/g, 0.1 mmole scale synthesis) and 9-fluorenylmethoxycarbonyl (Fmoc) protection chemistry. Peptide synthesis reagents, solvents, and Fmoc-protected amino acids were purchased from Advanced ChemTech, Fisher Scientific, and Novabiochem unless otherwise noted. Side chain deprotection and peptide cleavage was performed using a trifluoroacetic acid (TFA) cleavage cocktail (TFA/Triisopropylsilane (TIPS)/H<sub>2</sub>O, 95:3:2 or TFA/TIPS/1,2-ethanedithiol/H<sub>2</sub>O, 95:2.5:2.5:1 for sequences bearing a cysteine residue). Peptides were precipitated in ice-cold ether, filtered, and lyophilized. Disulfide bonded peptides were obtained by air oxidation of cysteine bearing peptides. Briefly, peptides were dissolved in 0.1 M Tris·Cl buffer, pH 8.2-8.5, with 0.5 M guanidium hydrochloride (Gdn·HCl) to give a final concentration of 0.5 mg/mL. The reaction mixture was stirred overnight with vessel open to air and quenched by addition of 5% TFA. All peptides were purified by RP-HPLC on C18 columns (Grace Vydac, preparative (22 × 250 mm, 10-15  $\mu$ m) and semi-preparative (10 × 250 mm, 10  $\mu$ m) using linear gradients of solvent A, [water/acetonitrile/TFA (99:1:0.1)] and solvent B, [water/acetonitrile/TFA (90:10:0.07)]. The purity of peptides was verified by analytical RP-HPLC (Grace Vydac, C18 column, 4.5 × 250 mm, 5  $\mu$ m). The molecular weights of the peptides were determined by MALDI TOF-MS using  $\alpha$ -cyano-4-hydroxycinnamic acid or sinapinic acid. Concentrations of peptide stock solutions were determined from UV-absorption of tryptophan ( $\epsilon = 5,690 \text{ M}^{-1}\cdot\text{cm}^{-1}$ ) and tyrosine ( $\epsilon = 1,215 \text{ M}^{-1}\cdot\text{cm}^{-1}$ ) residues at 280 and 276 nm, respectively in 6M Gdn·HCl, 0.01 M phosphate buffer, pH 6.5.<sup>1</sup>

**Overexpression and purification of Ocr and Ocr99:** *E. coli* strain BL21 (DE3) pLysS cells transformed with plasmids pAR2993, and pAR3790 were kind gifts from Prof. W. Studier (Brookhaven National Laboratory). Ocr and a truncated mutant of the protein lacking the C-terminal end, Ocr99, were expressed following literature protocols from plasmids pAR2993 and pAR3790, respectively.<sup>2-4</sup> Briefly, a single isolated colony was grown in 10 mL LB broth with 100  $\mu$ g/mL ampicillin and 34  $\mu$ g/mL chloramphenicol overnight using a incubator shaker at 37°C, 250 rpm. Fresh LB medium with the same antibiotic composition was inoculated with a 1:50 dilution of the overnight culture. Cells were further grown at 37 °C and 250 rpm until OD<sub>650</sub> of medium reached 0.6 (typically within 2.5 h) and were induced by addition of isopropyl  $\beta$ -D-thiogalactoside to 0.4 mM in each flask. The cells were harvested by centrifugation using a floor centrifuge for 1 h at 9,000 g after 3 h of induction period. Cell paste was stored at -20 °C (-80 °C for longer periods of storage) if it was not lysed immediately. Cell paste was resuspended (5 mL/g of cell paste) in low salt buffer (0.3 M NH<sub>4</sub>Cl, 20 mM Tris·Cl, 4% glycerol, pH 8.0). Benzamidinium hydrochloride hydrate and phenylmethylsulfonyl fluoride were added fresh to this buffer to give a final concentration of 10  $\mu$ M of each protease inhibitor. Cells were lysed while still on ice by sonication (1 minute/g of cell paste). Lysed cells were centrifuged at 20,000 g, 4 °C for 3 h. The cell debris was discarded and the supernatant was purified using three consecutive gel filtration columns to obtain pure Ocr/Ocr99.

The supernatant was first applied onto a XK 16/20 column packed with DEAE-sepharose fast flow anion exchange resin (Amersham Biosciences) pre-equilibrated with low salt buffer (0.3 M NH<sub>4</sub>Cl, 20 mM Tris·Cl, pH 8.0) for 180 minutes with a flow rate of 1 mL/min at 4 °C. A gradient from 30 to 100 % high salt buffer (1 M NH<sub>4</sub>Cl, 20 mM Tris·Cl, pH 8.0) was run for 1000 minutes with a flow rate of 1.0 mL/min at 4 °C. Fractions containing Ocr/Ocr99 were concentrated using Amicon-Ultra 15 centrifugal filter units with a molecular weight cut-off 5 kDa and were spun

using a swinging bucket rotor at 3,750 g and 4 °C. Concentrated samples were applied to a XK 16/70 column packed with Superdex 200 prep grade size exclusion resin (Amersham Biosciences) pre-equilibrated at 4 °C with a flow rate of 1 mL/min in low salt buffer. The column was run under the same conditions for 5 h. Any nucleic acid contamination was removed by applying samples onto a XK 16/20 phenyl-sepharose high performance column (Amersham Biosciences). Before each run the column was pre-equilibrated 3 h in 2.4 M (NH<sub>4</sub>)<sub>2</sub>SO<sub>4</sub>, 50 mM NH<sub>4</sub>Cl, 20 mM Tris·Cl, pH 8.0 with a flow rate of 1 mL/min, flushed with the same buffer for 30 min with a flow rate of 0.8 mL/min. The protein was eluted using a gradient from 2.4 to 0 M (NH<sub>4</sub>)<sub>2</sub>SO<sub>4</sub> in 20 mM Tris·Cl, pH 8.0 for 6 h at 4 °C. Samples were concentrated using Amicon filters, dialyzed against 20 mM Tris·Cl, pH 8.0 and stored at 4 °C. The concentration of Ocr and Ocr99 stocks were determined as described above using  $\epsilon = 31,860 \text{ M}^{-1}\cdot\text{cm}^{-1}$  and  $\epsilon = 29,430 \text{ M}^{-1}\cdot\text{cm}^{-1}$ , respectively at 280 nm.<sup>5</sup> The protein stock solutions were stored at -20 °C in low salt buffer supplemented with 50 % glycerol v/v for longer periods of time.

**Analytical Ultracentrifugation:** Apparent molecular masses of peptides were determined by sedimentation equilibrium on a Beckman ProteomeLab™ XL-I ultracentrifuge (Indianapolis, IN). Purified peptides were dissolved in 1× PBS (10 mM phosphate buffer, 137 mM NaCl, 2.7 mM KCl, pH 7.4) and loaded into equilibration cells at three different concentrations (10, 20, and 30 μM). The peptides were equilibrated at three rotor speeds (20,000, 35,000, and 40,000 rpm) for 18 h at 20 °C. Absorbance scans at 240, 270 and 280 nm were fit to equation (1) describing the equilibrium sedimentation of a homogeneous single ideal species:

$$\text{Abs}(r) = A' \exp[H \cdot M(x^2 - x_0^2)] + B \quad (1)$$

where *Abs* = Absorbance at radius *r*, *A'* = absorbance at reference radius *x*<sub>0</sub>,  $H = (1 - \bar{V} \rho) \cdot \omega^2 / 2RT$ , with  $\bar{V}$  = partial specific volume of the peptide,  $\rho$  = solvent density,  $\omega$  = angular velocity in radians/second, *M* = apparent molecular weight, *E* = blank absorbance. Data were fit using Igor Pro v5.03 and partial specific volumes and solution densities were calculated using the program SEDNTERP.

## References

1. C. N. Pace, F. Vajdos, L. Fee, G. Grimsley and T. Gray, *Protein Sci.*, 1995, **4**, 2411.
2. S. S. Sturrock, D. T. F. Dryden, C. Atanasiu, J. Dornan, S. Bruce, A. Cronshaw, P. Taylor and M. D. Walkinshaw, *Acta Crystallogr., Sect. D: Biol. Crystallogr.*, 2001, **57**, 1652.
3. J. J. Blackstock, S. U. Egelhaaf, C. Atanasiu, D. T. F. Dryden and W. C. K. Poon, *Biochemistry*, 2001, **40**, 9944.
4. K. K. Mark and F. W. Studier, *J. Biol. Chem.*, 1981, **256**, 2573.
5. C. Atanasiu, O. Byron, H. McMiken, S. S. Sturrock and D. T. F. Dryden, *Nucleic Acids Res.*, 2001, **29**, 3059.

## Supplementary Data

**Table S1.** The dimer coiled coil was superimposed on B-DNA backbone.

| Phosphorous Atom | Residue | Distance(Å) <sup>[a]</sup> | Side Chain Atom | Heptad Position |
|------------------|---------|----------------------------|-----------------|-----------------|
| 11B              | GLU 22A | 2.987                      | C <sub>δ</sub>  | <i>g</i>        |
| 10B              | GLU 22A | 4.936                      | C <sub>δ</sub>  | <i>g</i>        |
| 8B               | TYR 17A | 4.860                      | O <sub>η</sub>  | <i>b</i>        |
| 7B               | LEU 13A | 3.855                      | C <sub>γ</sub>  | <i>e</i>        |
| 6B               | LYS 8B  | 1.620                      | N <sub>ζ</sub>  | <i>e</i>        |
| 5B               | GLU 11B | 0.402                      | C <sub>δ</sub>  | <i>c</i>        |
| 4B               | GLU 10B | 1.058                      | C <sub>δ</sub>  | <i>b</i>        |
| 3B               | GLU 6B  | 6.114                      | C <sub>δ</sub>  | <i>e</i>        |
| 12A              | GLN 4B  | 2.227                      | C <sub>γ</sub>  | <i>c</i>        |
| 11A              | GLU 6A  | 4.936                      | C <sub>δ</sub>  | <i>e</i>        |
| 10A              | GLU 10A | 3.508                      | C <sub>δ</sub>  | <i>b</i>        |
| 8A               | GLU 11A | 3.009                      | C <sub>δ</sub>  | <i>c</i>        |
| 7A               | LYS 15A | 2.745                      | N <sub>ζ</sub>  | <i>g</i>        |
| 6A               | GLU 20B | 1.994                      | C <sub>δ</sub>  | <i>e</i>        |
| 5A               | ASN 21B | 2.362                      | C <sub>γ</sub>  | <i>f</i>        |
| 4A               | GLU 22B | 3.914                      | C <sub>δ</sub>  | <i>g</i>        |
| 3A               | LYS 27A | 4.864                      | N <sub>ζ</sub>  | <i>e</i>        |

[a] The closest atom on the side chain of selected amino acid was paired with the closest phosphorous atom on the B-DNA backbone. An rms fit of 3.765 Å was obtained.

**Table S2.** DM1 superimposed on B-DNA backbone.

| Phosphorous Atom | Residue | Distance(Å) <sup>[a]</sup> | Heptad Position |
|------------------|---------|----------------------------|-----------------|
| 12B              | GLU 6B  | 0.817                      | <i>g</i>        |
| 11B              | ASP 7B  | 1.634                      | <i>g</i>        |
| 10B              | GLU 11B | 2.363                      | <i>b</i>        |
| 7B               | GLU 20A | 3.131                      | <i>e</i>        |
| 6B               | ASP 21A | 1.671                      | <i>e</i>        |
| 5B               | GLU 22A | 3.294                      | <i>c</i>        |
| 10A              | GLU 27A | 2.803                      | <i>b</i>        |
| 8A               | GLU 18B | 1.260                      | <i>c</i>        |
| 7A               | ASP 17B | 2.536                      | <i>g</i>        |
| 4A               | GLU 11A | 2.333                      | <i>g</i>        |
| 3A               | GLU 10A | 2.224                      | <i>e</i>        |

[a] An rms fit of 2.309 Å was obtained. Shown are the distances between the C<sub>γ</sub> (Asp) or C<sub>δ</sub> (Glu) and phosphorous atoms.

**Table S3.** DM2 superimposed on B-DNA backbone.

| Phosphorous Atom | Residue | Distance(Å) <sup>[a]</sup> | Heptad Position |
|------------------|---------|----------------------------|-----------------|
| 12B              | GLU 6B  | 0.684                      | <i>g</i>        |
| 11B              | ASP 7B  | 1.658                      | <i>g</i>        |
| 10B              | GLU 11B | 2.201                      | <i>b</i>        |
| 7B               | GLU 20A | 3.229                      | <i>e</i>        |
| 6B               | ASP 21A | 1.526                      | <i>e</i>        |
| 5B               | GLU 22A | 3.272                      | <i>c</i>        |
| 10A              | GLU 27A | 1.883                      | <i>b</i>        |
| 8A               | GLU 18B | 1.482                      | <i>c</i>        |
| 7A               | ASP 17B | 2.465                      | <i>g</i>        |
| 4A               | GLU 11A | 2.252                      | <i>g</i>        |
| 3A               | GLU 10A | 2.210                      | <i>e</i>        |

[a] An rms fit of 2.190 Å was obtained. Shown are the distances between the C<sub>γ</sub> (Asp) or C<sub>δ</sub> (Glu) and phosphorous atoms.

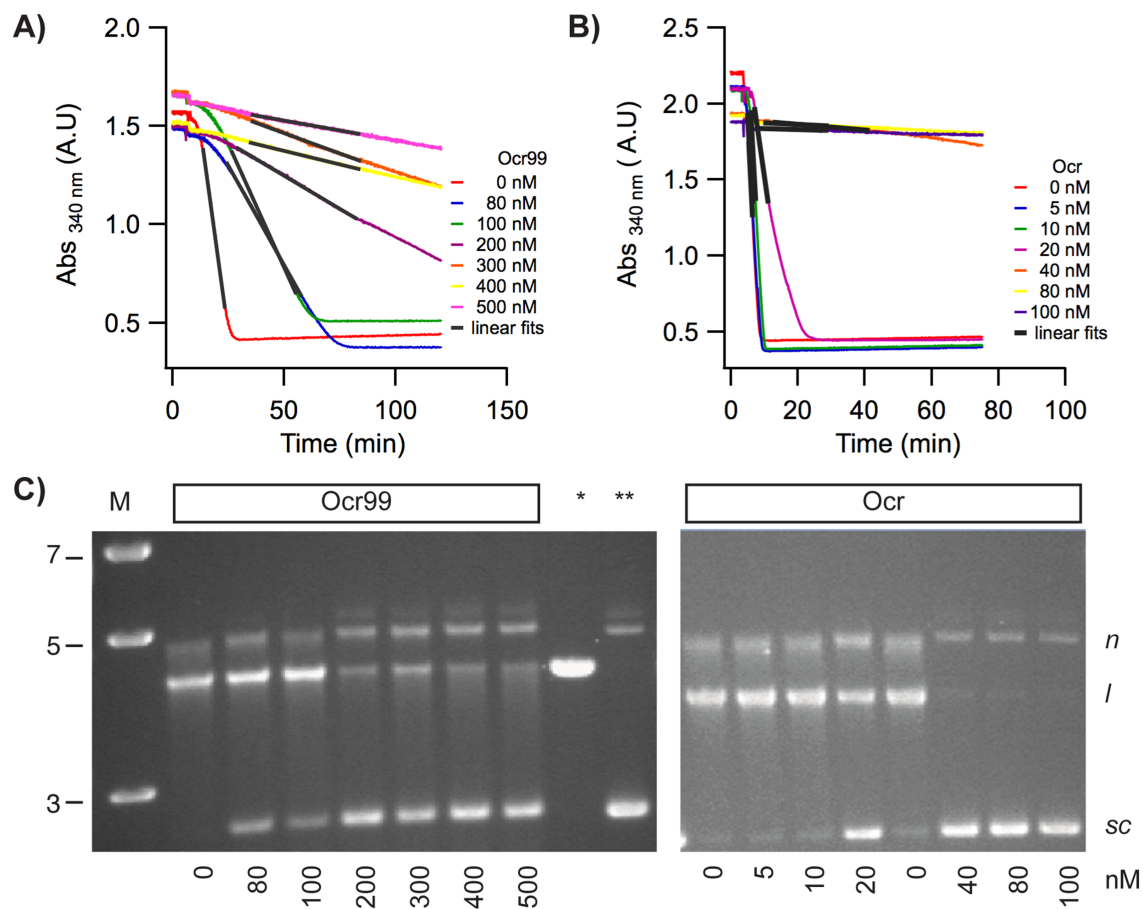

**Figure S1.** Sample ATPase plots showing linear fits to determine reaction rates for varying concentrations of A) Ocr99 and B) Ocr. C) Reaction mixtures from the ATPase assay were analyzed by agarose gel electrophoresis to monitor DNA cleavage. All reactions were initiated by addition of scDNA following a pre-incubation of all other components, including EcoR1241, Ocr99, and Ocr. [scDNA] = 5 nM, [EcoR1241] = 5 nM. The sizes of the DNA molecular weight marker (M) are in kilobase-pairs. \*scDNA digested in the absence of peptide inhibitor. \*\*scDNA alone. N, nicked circular DNA; l, linear and sc, negatively supercoiled DNA.

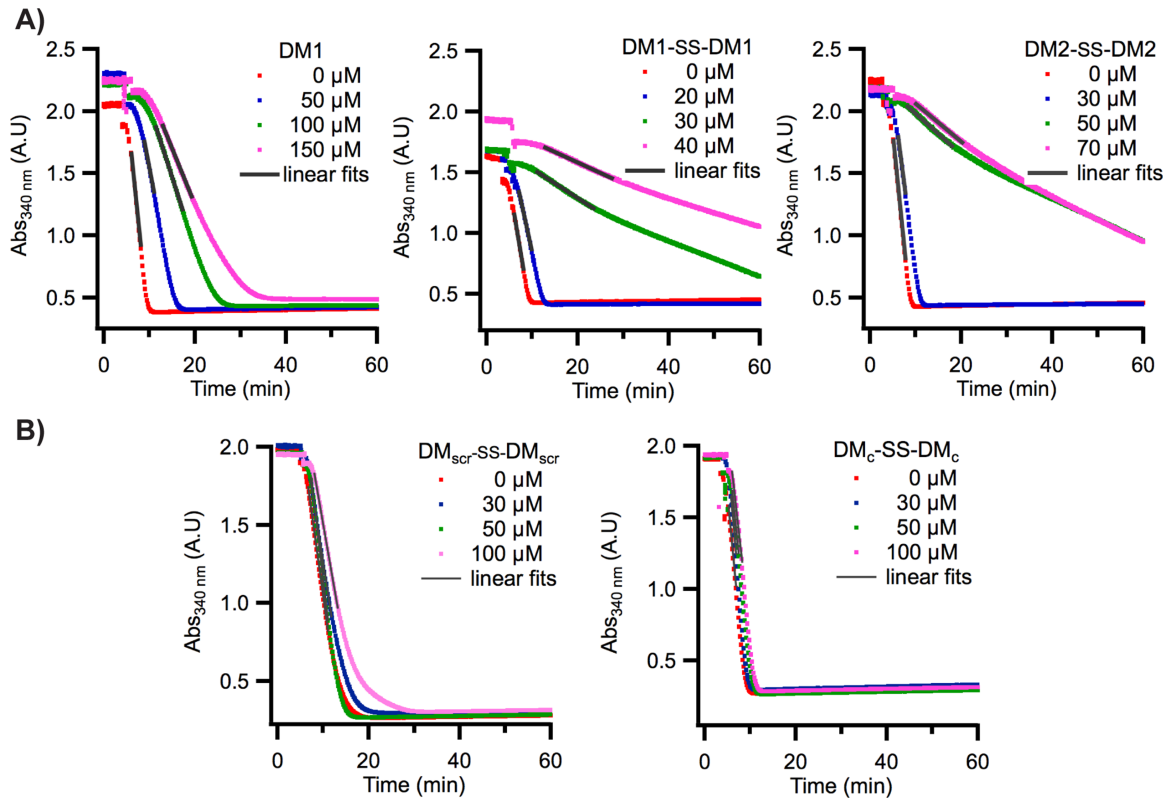

**Figure S2.** Sample ATPase plots showing linear fits to determine reaction rates in the presence of varying concentrations of A) Designed peptides DM1, DM1-ss-DM1, and DM2-ss-DM2 and B) peptide controls DM<sub>scr</sub>-ss-DM<sub>scr</sub> and DM<sub>c</sub>-ss-DM<sub>c</sub>.

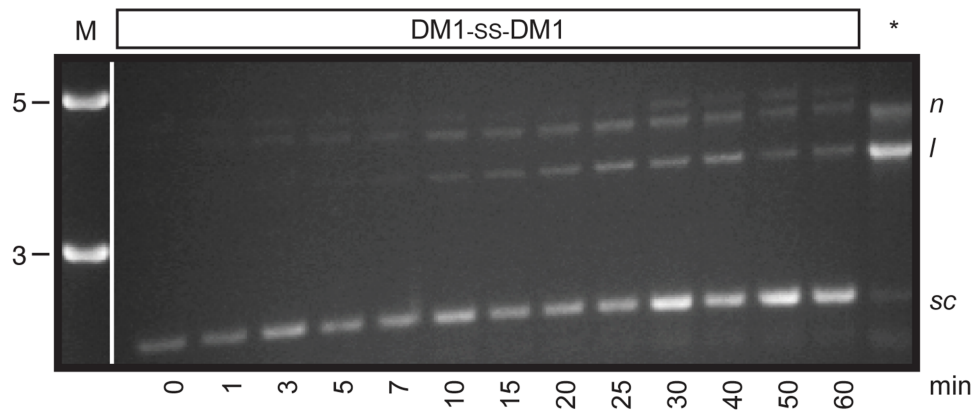

**Figure S3.** DNA cleavage assay as a function of time in the presence of DM1-ss-DM1. Reactions were initiated by addition of scDNA and DNA cleavage by EcoR124I was followed at 0° C over 60 min by agarose gel analysis. [scDNA] = 5 nM, [EcoR124I] = 5 nM, and [DM1-ss-DM1] = 40  $\mu$ M. The size of the DNA molecular weight marker (M) is in kilo-base-pairs. \*scDNA digested in the absence of peptide inhibitor. N, nicked circular DNA; l, linear and sc, negatively supercoiled DNA.

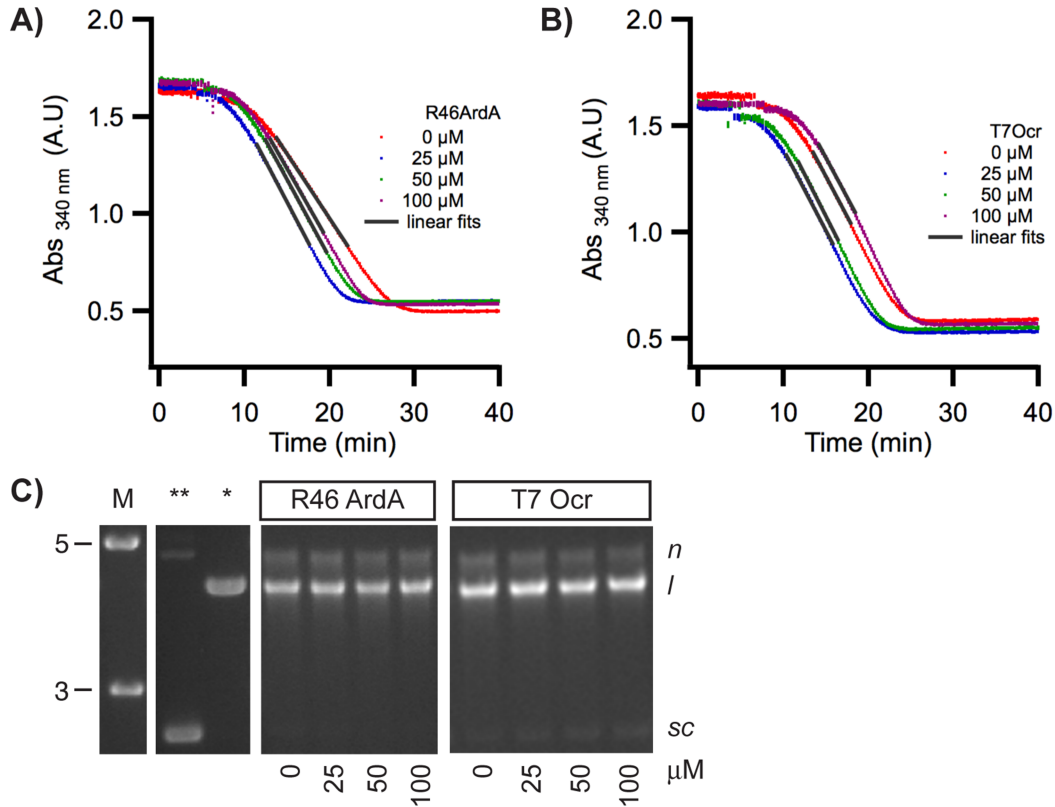

**Figure S4.** Sample ATPase plots showing linear fits to determine reaction rates in the presence of varying concentrations of A) R46 ArdA and B) T7 Ocr. C) Reaction mixtures from the ATPase assay were analyzed by agarose gel electrophoresis to monitor DNA cleavage. All reactions were initiated by addition of scDNA following a pre-incubation of all other components, including EcoR124I, T7 Ocr, and R46 ArdA. [scDNA] = 5 nM, [EcoR124I] = 5 nM. The sizes of the DNA molecular weight marker (M) are in kilobase-pairs. \*scDNA digested in the absence of peptide inhibitor. \*\*scDNA alone. N, nicked circular DNA; l, linear and sc, negatively supercoiled DNA.

**Table S4.** Summary of inhibitory action of Ocr and Ocr99.

| Inhibitor | Residues | Charge <sup>[a]</sup> | ATPase <sub>50</sub> <sup>[b]</sup> (μM) | scDNA <sub>50</sub> <sup>[c]</sup> (μM) |
|-----------|----------|-----------------------|------------------------------------------|-----------------------------------------|
| Ocr       | 117      | -28                   | 0.017 ± 0.001                            | 0.0235 ± 0.0031                         |
| Ocr99     | 99       | -18                   | 0.186 ± 0.004                            | 0.172 ± 0.011                           |

[a] Total net charge of the monomer. [b] Peptide concentration at which 50% of ATPase activity of the enzyme is inhibited. ATPase<sub>50</sub> values were calculated by fitting a straight line to the average relative rate vs. peptide concentration data. [c] Peptide concentration at which 50% of total DNA is scDNA. scDNA<sub>50</sub> was determined by fitting %scDNA vs. peptide concentration obtained from densitometric analysis of agarose gels. The data is represented as mean±SEM.

Sequence of Ocr: >1S7Z:A|PDBID|CHAIN|SEQUENCE:  
MAMSNMTYNNVFDHAYEMLKENIRYDDIRDITDDLHDAIHMAADNAVPHYADIFSVMASEGIDLEFEDSGLMPDT  
KDVIRILQARIYEQLTIDLWEDAEDLLNEYLEEVVEEYEEDEE

Sequence of Ocr99: >1S7Z:A|PDBID|CHAIN|SEQUENCE:  
MAMSNMTYNNVFDHAYEMLKENIRYDDIRDITDDLHDAIHMAADNAVPHYADIFSVMASEGIDLEFEDSGLMPDT  
KDVIRILQARIYEQLTIDLWEDA

**Table S5.** Helical content of DMs in 50 mM borate and 1.5M (NH<sub>4</sub>)<sub>2</sub>SO<sub>4</sub> buffers.

| Peptide                                 | Concentration<br>( $\mu$ M) | % Helicity   |                                                       |
|-----------------------------------------|-----------------------------|--------------|-------------------------------------------------------|
|                                         |                             | 50 mM Borate | 1.5 M (NH <sub>4</sub> ) <sub>2</sub> SO <sub>4</sub> |
| DM1                                     | 50                          | 9.0          | 15.5                                                  |
| DM1-SS-DM1                              | 50                          | 9.6          | 39.6                                                  |
| DM2-SS-DM2                              | 50                          | 10.1         | 76.2                                                  |
| DM <sub>ser</sub> -SS-DM <sub>ser</sub> | 50                          | 5.5          | 11.7                                                  |
| DM <sub>c</sub> -SS-DM <sub>c</sub>     | 50                          | 3.7          | 7.8                                                   |
| Ocr99                                   | 25                          | 15.8         | 52.5                                                  |

**Table S6.** Summary of average fitted molecular weight of peptides using analytical equilibrium sedimentation.

| Peptide    | Formula MW<br>(Da) | Concentration<br>( $\mu$ M) | Average fitted<br>MW (Da) | Ratio | Oligomeric State |
|------------|--------------------|-----------------------------|---------------------------|-------|------------------|
| DM1        | 3519.8             | 10                          | 3583.2 $\pm$ 269.2        | 1.02  | Monomer          |
|            |                    | 20                          | 5073.9 $\pm$ 110.3        | 1.44  | Monomer-dimer    |
|            |                    | 30                          | 4599.2 $\pm$ 48.8         | 1.31  | Monomer-dimer    |
| DM1-SS-DM1 | 7121.6             | 10                          | 6782.6 $\pm$ 236.7        | 0.95  | Monomer          |
|            |                    | 20                          | 8833.9 $\pm$ 459          | 1.22  | Monomer          |
| DM2-SS-DM2 | 7235.6             | 10                          | 8403.4 $\pm$ 101.3        | 1.16  | Monomer          |
|            |                    | 20                          | 8600.8 $\pm$ 60.4         | 1.26  | Monomer          |
|            |                    | 30                          | 9085.3 $\pm$ 193.5        | 1.19  | Monomer          |
